## ***Ion Channels in Vascular Smooth Muscle***

### ***Physiology and Pharmacology***

Zeljko J. Bosnjak, Ph.D.

VASCULAR smooth muscle regulation is accomplished by several major regulatory mechanisms, including: (1) neural transmitters (*e.g.*, norepinephrine [NE], adenosine triphosphate [ATP], and nitric oxide [NO]); (2) endothelial factors (*e.g.*, endothelium-derived relaxing factor [EDRF], endothelium-derived hyperpolarizing factor [EDHF], and endothelins); (3) metabolic influences (*e.g.*, oxygen and carbon dioxide tension, pH, and temperature); (4) humoral agents (*e.g.*, NE, epinephrine [E], histamine, angiotensin II [Ang II], vasopressin [ADH], vasoactive intestinal peptide [VIP], atrial natriuretic peptide [ANP], and others); and (5) myogenic influences (*e.g.*, intraluminal pressure and stretch).

The pathways that are responsible for the excitation of vascular smooth muscle include: (1) nerve stimulation-induced contractions without change in smooth muscle membrane potential; (2) neurotransmitter-induced smooth muscle action potential generation after nerve stimulation leading to contraction; (3) persistent depolarization of the smooth muscle and muscle contraction caused by neurotransmitters or other vasoactive substances and transmural pressure; and (4) contractions initiated by spontaneous action potentials generated by some smooth muscle cells acting as pacemakers, and the subsequent spread of excitation *via* gap junctions and cell-to-cell conduction.

A number of the above-listed categories may be superimposed on, or occur as a consequence of, previous excitation, such as a steady level of depolarization. Moreover, some smooth muscle cells may not have ac-

cess to neurally released neurotransmitters, but may be coupled to other cells by a gap junction. Therefore, there is a considerable qualitative and quantitative difference throughout the vascular beds because of the multiplicity of vascular smooth muscle excitations, including the type and density of innervation, presence of pacemaker cells, intraluminal pressure, type and density of receptors, number of low-resistance gap junctions, and type and number of ion channels (fig. 1).

For the most part, two regulatory systems control vascular smooth muscle tone: endothelium and the sympathetic nervous system. Modulation of vascular tone by the sympathetic nervous system reflects the perfusion requirements of the intact organism after input from the peripheral and central baro- and chemoreceptors to the central nervous system pressor centers. The endothelium influences the tone by releasing a number of vasoactive factors in response to a variety of changes in the chemical and physical environment around the specific vascular bed. There are several possible interactions between factors released from neural endings and endothelium, although these interactions depend on the relative distribution of these regulatory systems in a given vessel bed.<sup>1</sup>

The key mechanism in the interaction between the two regulatory systems involves the alteration in the concentration of ionized calcium ( $\text{Ca}^{2+}$ ) in the cytoplasm of the smooth muscle cell. At rest, the intracellular  $\text{Ca}^{2+}$  concentration in smooth muscle is approximately  $0.1 \mu\text{M}$ , and, during the maximum activation, it ranges from 1 to  $10 \mu\text{M}$ .<sup>2</sup> Depolarization of the vascular smooth muscle membrane by high extracellular  $\text{K}^+$  or agonists causes a relatively rapid increase in cytoplasmic  $\text{Ca}^{2+}$ , which then declines somewhat to a new level during persistent depolarization. The principle source of the  $\text{Ca}^{2+}$  is likely to be  $\text{Ca}^{2+}$  influx through the sarcolemma, although  $\text{Ca}^{2+}$  release from the endoplasmic reticulum is also present. On the other hand,  $\text{Ca}^{2+}$  mobilization by a number of different li-

---

Received from the Departments of Anesthesiology and Physiology, The Medical College of Wisconsin, Milwaukee, Wisconsin. Accepted for publication July 13, 1993. Supported in part by National Institutes of Health grants HL01901 and HL34708 and Anesthesiology Research Training grant GM08377.

Address reprint requests to Professor Bosnjak: The Medical College of Wisconsin, 8701 West Watertown Plank Road, Milwaukee, Wisconsin 53226.

## ION CHANNELS IN VASCULAR SMOOTH MUSCLE

gands may start with a breakdown of membrane phospholipids and the formation of inositol 1,4,5-triphosphate (IP<sub>3</sub>) and diacylglycerol (DAG). In vascular smooth muscle, one of the major roles of IP<sub>3</sub> is to release Ca<sup>2+</sup> from the sarcoplasmic reticulum (SR).

Influx of Ca<sup>2+</sup> from the extracellular space occurs through the voltage-operated channels (VOC), receptor-operated channels (ROC), and nonselective cation channel (NSCC), and by reversed Na<sup>+</sup>/Ca<sup>2+</sup> exchange mechanism. Additional calcium is released from the mitochondria and sarcoplasmic reticulum (SR; fig. 2). The voltage-gated calcium channels are subdivided into long-lasting (L-), transient (T-), and resting (R-) types of channels. The channels responsible for the release of Ca<sup>2+</sup> from the SR are ryanodine channels (Ca<sup>2+</sup>-induced Ca<sup>2+</sup> release channel, caffeine sensitive) and IP<sub>3</sub> channels (heparin sensitive). Factors contributing to a decrease in intracellular calcium include calcium pumps in the sarcolemma, endoplasmic reticulum, and mitochondria, along with a forward mode of the Na<sup>+</sup>/Ca<sup>2+</sup> exchanger (fig. 2).

## Receptors

The stimulation of different receptors in smooth muscle cells by agents such as norepinephrine, acetylcholine, and serotonin induces the breakdown of poly-

phosphoinositides.<sup>3</sup> This process initially involves the activation of phospholipase C enzyme, which hydrolyzes phosphatidylinositol 4,5 bisphosphate (PIP<sub>2</sub>), leading to the production of IP<sub>3</sub> and 1,2-diacylglycerol (DAG). Both compounds are intracellular second messengers. From the cell membrane, the IP<sub>3</sub> diffuses to the SR and mobilizes intracellular Ca<sup>2+</sup>. It is generally accepted that IP<sub>3</sub>-sensitive and IP<sub>3</sub>-insensitive Ca<sup>2+</sup> stores can coexist in the same smooth muscle cells with the two pools being interdependent.<sup>4</sup> It was proposed that caffeine could deplete a caffeine- (and Ca<sup>2+</sup>-) sensitive pool, and also indirectly affect the IP<sub>3</sub> pool. The increase in ionized Ca<sup>2+</sup> appears to be responsible for the phasic component of the smooth muscle contractile response. However, to obtain the maximal and longer contractile response from the smooth muscle, a tonic component is necessary that requires the activation of ROC or VOC.<sup>2</sup> Both types of contractions could be induced, for example, by simultaneous stimulation of  $\alpha_1$  and  $\alpha_2$  adrenoceptors leading to Ca<sup>2+</sup> release from intracellular stores and Ca<sup>2+</sup> influx, respectively. It should be pointed out, however, that vascular smooth muscle contraction is generally tonic in nature. The blood vessels, for instance, unlike cardiac and skeletal muscle, can remain in a contracted state for prolonged periods of time.

Most blood vessels have both  $\alpha_1$ - and  $\alpha_2$ -adrenergic subtypes, and their stimulation by agonists leads to

**Fig. 1.** Vascular smooth muscle cells have both plasma membrane-bound and intracellular receptors. The major sarcolemmal receptors include  $\alpha$ -adrenergic,  $\beta$ -adrenergic, and muscarinic cholinergic receptors. Also present are the receptors for ATP, endothelin, serotonin, histamine, angiotensin II, VIP, stretch, and others. Intracellular receptors responsible for the release of Ca<sup>2+</sup> from the intracellular stores include inositol 1,4,5-triphosphate (IP<sub>3</sub>) and ryanodine (Ry) receptors. In addition, nitric oxide (NO) will enhance the activity of cellular guanylyl cyclase. Along with channels for Ca<sup>2+</sup>, Cl<sup>-</sup>, K<sup>+</sup>, and Na<sup>+</sup>, the sarcolemma of the vascular smooth muscle also contains a nonspecific cation channel (NSCC). The ionic exchangers in the sarcolemma include Na<sup>+</sup>/Ca<sup>2+</sup>, HCO<sub>3</sub><sup>-</sup>/Cl<sup>-</sup>, and Na<sup>+</sup>/H<sup>+</sup> exchanger; and the ATP-dependent pumps are Na<sup>+</sup>/K<sup>+</sup> and Ca<sup>2+</sup> pumps with H<sup>+</sup> or K<sup>+</sup> as a counterion. Gap junctions are formed between the cells, and are responsible for the ionic exchange between cells and electrotonic coupling.

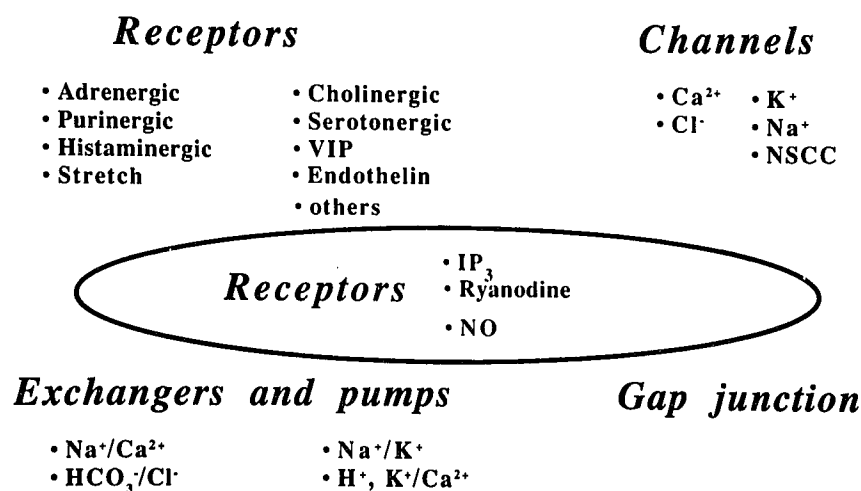

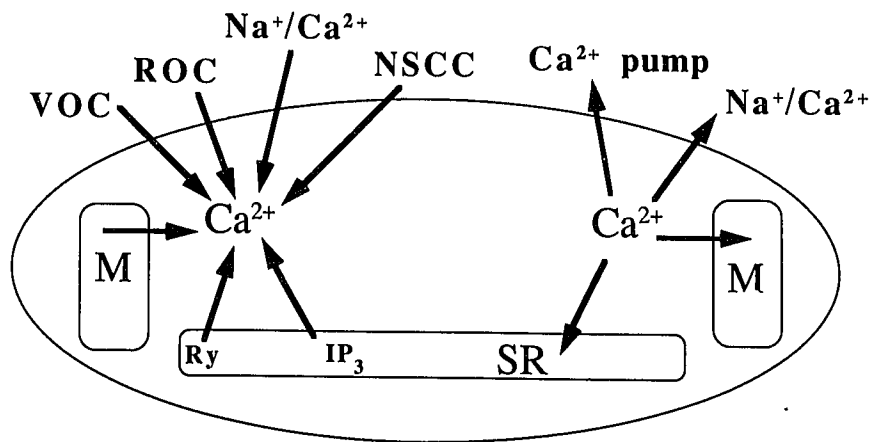

Fig. 2. Diagram depicting different  $\text{Ca}^{2+}$  pathways in the sarcolemma and sarcoplasmic reticulum (SR) of the vascular smooth muscle cell. Different pathways contributing to an increase in intracellular  $\text{Ca}^{2+}$  are depicted on the left of this schematic diagram. Influx of  $\text{Ca}^{2+}$  from the outside of vascular smooth muscle cell occurs *via* voltage-operated channels (VOC), receptor-operated channels (ROC), reversed  $\text{Na}^{+}/\text{Ca}^{2+}$  exchanger, and nonspecific cation channel (NSCC). Although some  $\text{Ca}^{2+}$  can be derived from mitochondria (M), most of the  $\text{Ca}^{2+}$  supplied for contraction from intracellular stores comes from the SR after the stimulation of ryanodine (Ry) or inositol 1,4,5-triphosphate ( $\text{IP}_3$ ) channels. Factors contributing to a decrease in intracellular  $\text{Ca}^{2+}$  are shown on the right, and include  $\text{Ca}^{2+}$  pump and forward mode of the  $\text{Na}^{+}/\text{Ca}^{2+}$  exchanger in sarcolemma. An active reuptake by the mitochondria and the SR also contribute to the cellular sequestration of ionized  $\text{Ca}^{2+}$ .

smooth muscle contraction. The relative proportion of adrenergic subtypes and their numbers vary considerably between different vascular beds. Norepinephrine, when applied exogenously, either depolarizes the sarcolemma or has no effect on the membrane potential of the smooth muscle cells. Because norepinephrine, with few exceptions (such as cerebral arteries), consistently evokes contraction, depolarization of the membrane is not always a prerequisite for the initiation of contraction after  $\alpha_1$  adrenoceptor stimulation. An  $\alpha_2$  adrenoceptor stimulation (coupled to G protein) activates the membrane-associated  $\text{Ca}^{2+}$  channel to produce  $\text{Ca}^{2+}$  influx and cellular depolarization. By stimulating  $\alpha_1$  receptors, norepinephrine activates phosphatidylinositol hydrolysis by phospholipase C, which, in turn, leads to the generation of two second messengers:  $\text{IP}_3$  and DAG.<sup>5</sup> After the release of  $\text{Ca}^{2+}$  from the SR, intracellular  $\text{Ca}^{2+}$  leads to an increase in chloride conduction and the opening of nonspecific cation channels and subsequent membrane depolarization.<sup>6</sup> Equilibrium potentials for both  $\text{Na}^{+}$  ( $E_{\text{Na}} = +50$  mV) and  $\text{Cl}^{-}$  ( $E_{\text{Cl}} = -20$  mV) are more positive than the resting membrane potential ( $E_m = -40$  to  $-55$  mV).<sup>7</sup> In addition, norepinephrine appears to enhance voltage-dependent  $\text{Ca}^{2+}$  channel current by increasing the open-state probability ( $P_o$ ) of single  $\text{Ca}^{2+}$  channels, but the membrane depolarization induced by activation of  $\text{Ca}^{2+}$  activated chloride channels is

the prerequisite for further stimulation of  $\text{Ca}^{2+}$  channels in response to norepinephrine. Furthermore, norepinephrine may induce a shift in the relationship between  $P_o$  of the voltage-gated  $\text{Ca}^{2+}$  channel and the membrane potential.<sup>8</sup> At a given potential, more of the voltage-sensitive  $\text{Ca}^{2+}$  channels are open in the presence of norepinephrine. Therefore, norepinephrine increases intracellular  $\text{Ca}^{2+}$  concentration *via* release of  $\text{Ca}^{2+}$  from intracellular stores, stimulation of  $\text{Ca}^{2+}$  influx through receptor-operated channel, and activation of voltage-dependent  $\text{Ca}^{2+}$  channels.<sup>2</sup>

$\beta$ -Adrenergic receptors are also found in most blood vessels, and, when stimulated, they inhibit contraction of the vascular smooth muscle.  $\beta_1$  and  $\beta_2$ -adrenoreceptor subtypes are coupled to adenylyl cyclase *via*  $G_s$  protein. In turn, adenylyl cyclase mediates the conversion of ATP to cAMP that can lead to vasodilation. In some cells, this inhibition is essentially ineffective, because  $\alpha_2$  receptors are coupled to the same adenylyl cyclase *via*  $G_i$  protein that inhibits cAMP production. Nevertheless, some vessels only dilate in the presence of NE, most likely because of a specific adrenoceptor population in the sarcolemma.

Stimulation of muscarinic cholinergic receptors on the smooth muscle cells will cause contractions that are likely to be mediated by phosphoinositides. This direct effect will not be seen in most vessels, because ACh will release EDRF from the endothelial cells at the

same time. Although vasodilation will be dominant in most arteries, peripheral veins may dilate only with lower levels of ACh and constrict at higher concentrations.

Both norepinephrine and ATP are released from functional sympathetic nerve terminals. The ATP can act from intra- and extracellular sites on the smooth muscle cells. From intracellular sites, ATP activates voltage-dependent  $\text{Ca}^{2+}$  channels, and, from extracellular sites, ATP acts on the purinergic-2 (P-2) receptor and, possibly, on the voltage-dependent  $\text{Ca}^{2+}$  channels. ATP can depolarize the membrane of vascular smooth muscle cells (an exception appears to be coronary artery) by binding to the P-2 receptors that are coupled to  $\text{Ca}^{2+}$  channel producing contraction.

Vasopressin (ADH) triggers  $\text{IP}_3$ -sensitive release of  $\text{Ca}^{2+}$  from internal stores,<sup>4</sup> which then propagates throughout the cell as an intracellular  $\text{Ca}^{2+}$  wave, and activates its own release through  $\text{Ca}^{2+}$ -induced release of  $\text{Ca}^{2+}$  by diffusing to remote  $\text{Ca}^{2+}$  release sites. In addition, vasopressin can block the ATP-sensitive potassium channels ( $\text{K}_{\text{ATP}}$ ),<sup>9</sup> leading to depolarization of smooth muscle cell, and subsequent contraction.

The sensitivity of vascular smooth muscle to  $\text{Ca}^{2+}$  antagonists varies depending on the vascular bed, vessel size, subtype of receptors present, and affinity of receptor-operated channels for the  $\text{Ca}^{2+}$  blocker. It appears that voltage-operated channels are generally more sensitive to  $\text{Ca}^{2+}$  antagonists than receptor-operated channels.<sup>10</sup>

While the underlying mechanism of angiotensin II effects on vascular smooth muscle are not fully understood, it appears that angiotensin II contracts the smooth muscle by stimulating  $\text{Ca}^{2+}$  influx *via* voltage-dependent  $\text{Ca}^{2+}$  channels.<sup>11,12</sup> This action may be mediated by G protein, and occurs with or without depolarization. In addition, angiotensin II also activates the formation of  $\text{IP}_3$  and DAG through a G protein-mediated activation of phospholipase C. In addition to these actions, angiotensin II was shown to block  $\text{K}^+$  currents.<sup>13</sup>

Vasoactive intestinal peptide (VIP) has a powerful ability to relax vascular and nonvascular smooth muscle. The VIP binds to a specific membrane receptor and selectively stimulates adenyl cyclase to promote the accumulation of the cAMP and smooth muscle relaxation.

Endothelin-1 (ET-1) is a powerful vasoactive peptide released by endothelial cells<sup>14</sup> that activates ET-1 receptors in smooth muscle. Stimulation of ET-1 recep-

tors can produce phospholipase C activation, which leads to stimulation of inositol phosphate turnover and the diacylglycerol production. This leads to stimulation of protein kinase C, which induces opening of  $\text{Ca}^{2+}$  channels. In addition, ET-1 releases  $\text{Ca}^{2+}$  from the SR through an  $\text{IP}_3$  response, which acts as a second messenger in modulating the membrane currents.<sup>15</sup> The elevated intracellular  $\text{Ca}^{2+}$  is responsible for a sustained activation of  $\text{Cl}^-$  channel current, which depolarizes the membrane and is responsible for prolonged  $\text{Ca}^{2+}$  influx, or nonselective cation current and contraction.<sup>16</sup> Therefore, depending on the smooth muscle, ET-1-induced vasoconstriction can be initiated by  $\text{Ca}^{2+}$  influx across the sarcolemma (both  $\text{Ca}^{2+}$  selective and nonselective), or by  $\text{IP}_3$ -triggered release of  $\text{Ca}^{2+}$  from endoplasmic reticular stores. An additional effect of ET-1 on smooth muscle is increased myofilament  $\text{Ca}^{2+}$  sensitivity by a G protein-dependent pathway.<sup>17,18</sup> In addition to ET-1, other endothelium-derived peptides have been subsequently described, including ET-2, ET-3, and sarafotoxin.<sup>19</sup>

If the intravascular pressure is elevated, most vessels respond by increasing smooth muscle tone, and, if the pressure is reduced, they vasodilate. The mechanism of the initiation of the myogenic response to increased or decreased transmural pressure or stretch is not known. Membrane potentials of smooth muscle cells measured *in vitro* range between  $-60$  and  $-75$  mV, and those measured *in vivo* are between  $-40$  and  $-55$  mV.<sup>7</sup> When isolated arteries are exposed to physiologic intraluminal pressures, they depolarize (to  $-40$  to  $-55$  mV) and develop tone. There are a number of proposed mechanisms of intravascular pressure or stretch-induced alterations in vascular smooth muscle activation.<sup>20</sup> Some of the mechanisms include: (1) stretch-induced alterations in sarcolemmal properties, and subsequent activation or inhibition of the net inward current, or specific modulation of the signal coupling pathway within the smooth muscle cell; (2) length-induced alterations in contractile protein function; and (3) pressure and/or stretch-induced modulation of endothelial function.

Because the membrane potential of arterial smooth muscle cells *in vivo* falls in the range in which the current through the voltage-operated  $\text{Ca}^{2+}$  channels is highly voltage dependent, this current is likely to play a significant role in the maintenance of vascular tone. Depolarizations up to  $-40$  mV activate and maintain inward  $\text{Ca}^{2+}$  current that does not significantly inactivate. It was shown that the  $P_o$  of  $\text{Ca}^{2+}$  channel increases

exponentially with membrane depolarization between  $-60$  and  $-40$  mV.<sup>21</sup> Between these potentials, a membrane hyperpolarization of only 2 mV could decrease  $P_o$  and, therefore,  $\text{Ca}^{2+}$  entry by approximately 30%.

## Exchangers and Pumps

The membrane of vascular smooth muscle also contains  $\text{Na}^+/\text{H}^+$ ,  $\text{HCO}_3^-/\text{Cl}^-$ , and  $\text{Na}^+/\text{Ca}^{2+}$  exchangers, as well as the  $\text{Na}^+/\text{K}^+$  and  $\text{Ca}^{2+}$  pump.<sup>22</sup> The  $\text{Ca}^{2+}$  pump is stimulated by agents that increase cGMP (*e.g.*, ANF, EDRF, and nitrovasodilators).<sup>23</sup> On the other hand, increases in  $\text{K}^+$  conductance as a result of activation of any of the  $\text{K}^+$  channels will lead to membrane hyperpolarization and inactivation of voltage-operated  $\text{Ca}^{2+}$  channels, and enhanced  $\text{Ca}^{2+}$  efflux *via*  $\text{Na}^+/\text{Ca}^{2+}$  exchanger.<sup>24</sup> It was shown that  $\text{Na}^+/\text{Ca}^{2+}$  exchange is dependent on membrane potential, with membrane depolarization decreasing the net  $\text{Ca}^{2+}$  extrusion by the exchanger.<sup>24</sup>

## Channels

### Calcium Channels

At least two types of  $\text{Ca}^{2+}$  currents are present in vascular smooth muscle; L-type (long lasting) and T-type (transient). The T-type current activates and inactivates relatively rapidly at more negative potentials, and its inactivation is monoexponential and slowly voltage dependent. This current is not sensitive to classic  $\text{Ca}^{2+}$  channel blockers, as compared with the L-type current. The L-type  $\text{Ca}^{2+}$  channel inactivation is both voltage and  $\text{Ca}^{2+}$  dependent, and, therefore, biexponential. In addition, the slow  $\text{Ca}^{2+}$  channel current is abolished when the production of ATP is inhibited.<sup>25</sup> A new type of  $\text{Ca}^{2+}$  channel, called R-type (resting), was recently described in aortic and renal smooth muscle cells.<sup>26</sup> This type of channel is apparently responsible for the sustained increase of  $\text{Ca}^{2+}$  during tonic contraction of smooth muscle that occurs during depolarization of the cell membrane in the presence of high levels of extracellular  $\text{K}^+$ .

Phosphorylation of the  $\text{Ca}^{2+}$  slow channel protein can be either excitatory (protein kinase C, PK-C) or inhibitory (cAMP-PK and cGMP-PK). For instance, angiotensin II activates the PL-C *via* a G protein, and PL-C stimulates PI turnover, leading to production of  $\text{IP}_3$  and DAG. DAG activates PK-C to phosphorylate a number of proteins, including the  $\text{Ca}^{2+}$  slow channel, and to

stimulate  $\text{Ca}^{2+}$  influx.<sup>25</sup> As to the inhibitory role of cyclic nucleotides in regulation of intracellular  $\text{Ca}^{2+}$ , activation of A-cyclase or G-cyclase by agents such as  $\beta$ -adrenergic agonists, prostacycline, or atrial natriuretic factor (ANF), or directly by agents like nitroprusside and EDRF, leads to an increase in cyclic AMP and cyclic GMP and activation of cA-PK and cG-PK. These kinases are responsible for phosphorylation of  $\text{Ca}^{2+}$  channels, which leads to inhibition of calcium channel opening and phosphorylation of  $\text{K}^+$  channels, leading to stimulation of  $\text{K}^+$  channel opening. ATP is required for activity of the channel, either by binding to the channel itself or *via* phosphorylation.<sup>25</sup> In addition, the  $\text{Ca}^{2+}$  influx will be influenced by intracellular  $\text{Ca}^{2+}$  (increases in cytosolic  $\text{Ca}^{2+}$  accelerate the inactivation process of the  $\text{Ca}^{2+}$  channel, as shown in fig. 3) and membrane potential (depolarization will activate receptor-operated channels). Inhibition of  $\text{Ca}^{2+}$  slow channels, and stimulation of  $\text{K}^+$  channels, would inhibit  $\text{Ca}^{2+}$  influx and lower intracellular  $\text{Ca}^{2+}$ . In addition to  $\text{Ca}^{2+}$  and  $\text{K}^+$  channels, cA-PK and cG-PK phosphorylate the  $\text{Na}^+/\text{Ca}^{2+}$  exchanger and the sarcolemmal  $\text{Ca}^{2+}$ -ATPase to stimulate the  $\text{Ca}^{2+}$  pump, and, therefore, can enhance activities of all three  $\text{Ca}^{2+}$ -removal systems in vascular smooth muscle, producing vasodilation.<sup>25,27,28</sup> In myocardial cells, however,  $\text{Ca}^{2+}$  channel phosphorylation by the cAMP-dependent protein kinase leads to an opposite effect, *i.e.*, an increase in  $\text{Ca}^{2+}$  influx. The effects of phosphorylation by a cGMP-PK are similar in cardiac and smooth muscle cells.

### Potassium Channels

In different vascular smooth muscles, a variety of macroscopic  $\text{K}^+$  currents have been detected, including: (1)  $\text{Ca}^{2+}$ -activated  $\text{K}^+$  current; (2) delayed rectifier  $\text{K}^+$  current; (3) ATP-sensitive  $\text{K}^+$  current; (4) inward rectifier  $\text{K}^+$  current; and (5) background  $\text{K}^+$  current.<sup>26,29,30</sup>

The major outward current in vascular smooth muscle in response to membrane depolarization is carried by the large conductance  $\text{Ca}^{2+}$ -activated potassium channel ( $\text{K}_{\text{Ca}}$ ). The  $P_o$  of this channel is relatively low at resting membrane potential, but increases in proportion to membrane depolarization and elevation of intracellular  $\text{Ca}^{2+}$  concentration.<sup>31,32</sup> An increase in  $\text{K}^+$  efflux would cause membrane hyperpolarization, reduce the opening probability of voltage-dependent  $\text{Ca}^{2+}$  channels, and produce subsequent vascular relaxation.

Fig. 3. Schematic diagram of some of the effects of elevated intracellular  $\text{Ca}^{2+}$ . The  $\text{Ca}^{2+}$  can release SR  $\text{Ca}^{2+}$  stores through  $\text{Ca}^{2+}$ -activated  $\text{Ca}^{2+}$  release. In addition,  $\text{Ca}^{2+}$  activates sarcolemmal chloride and  $\text{K}^+$  channels at negative membrane potentials ( $E_m$ ), and nonselective cation channels (NSCC) at positive membrane potentials. Moreover, cytosolic  $\text{Ca}^{2+}$  accelerates the inactivation process of the sarcolemmal  $\text{Ca}^{2+}$  channel.

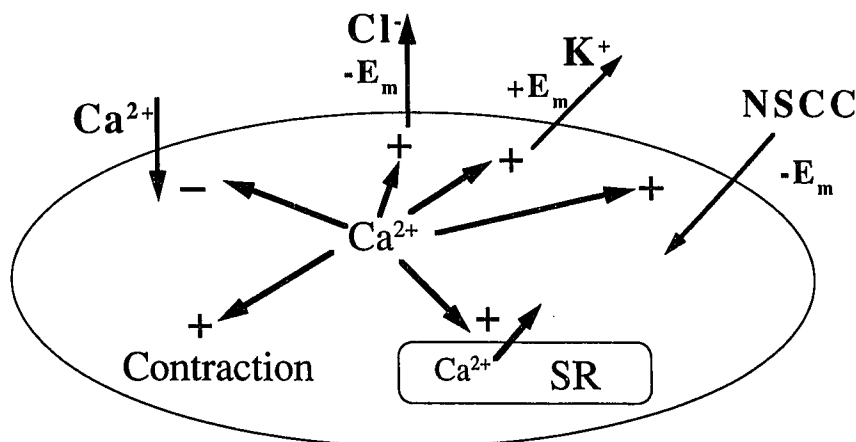

These channels appear to play a role in a vasodilating feedback pathway that is activated by pressure, intracellular free  $\text{Ca}^{2+}$ , or membrane depolarization.<sup>33</sup> The open time and frequency of opening of  $\text{K}_{\text{Ca}}$  channels are increased by 5'-GMP, a major metabolite of cGMP. The agents that increase the level of cGMP (ANF, NO, and nitrovasodilators) may, therefore, indirectly stimulate the  $\text{K}_{\text{Ca}}$ . Some of the other modulatory agents for these channels include norepinephrine, histamine, acetylcholine, endothelin, angiotensin II, nitroglycerin, and cGMP.<sup>34</sup> It appears, therefore, that  $\text{K}_{\text{Ca}}$  modulation may be an important regulatory mechanism of smooth muscle function.  $\text{K}_{\text{Ca}}$  current may not contribute to regulation of resting tension, or its role is minor in the presence of normal intracellular  $\text{Ca}^{2+}$ .<sup>35</sup> Another possible argument for the regulation of resting tension is that a very small number of open  $\text{K}^+$  channels is required for maintenance of resting membrane potential, as suggested by Nelson.<sup>21</sup> Moreover, because of their high density per smooth muscle cell, large conductance, and the high input resistance,  $\text{K}_{\text{Ca}}$  channels may also contribute to the resting membrane potential.

The delayed rectifier (also called outwardly rectifying)  $\text{K}^+$  current ( $\text{K}_{\text{dr}}$ ) is voltage and  $\text{Ca}^{2+}$  dependent.<sup>7,36,37</sup> This current is activated when the potential across sarcolemma is more positive than  $-40$  mV, and plays a dominant role in membrane repolarization and, to a degree, in maintaining the resting potential of aortic smooth muscle. It can be modulated by second messengers and angiotensin II. The activation of these channels at the physiologic range of membrane potential will lead to membrane hyperpolarization and inactivation of L-type  $\text{Ca}^{2+}$  channels. On the other hand, high levels of these dilators may lead to cGMP-induced

block of L-type  $\text{Ca}^{2+}$  channels, an effect similar to that produced by isoproterenol.

The ATP-sensitive  $\text{K}^+$  channel ( $\text{K}_{\text{ATP}}$ ) of smooth muscle is involved in the mechanism of action of many vasodilator substances known as  $\text{K}^+$  channel openers (*i.e.*, pinacidil, minoxidil, nicorandil, and chromokalm).<sup>38</sup> These channels are only weakly voltage dependent, and are not influenced by changes in intracellular  $\text{Ca}^{2+}$ . Hyperpolarization produced by the activation of  $\text{K}_{\text{ATP}}$  channels will effectively inactivate  $\text{Ca}^{2+}$  channels and decrease  $\text{Ca}^{2+}$  influx, leading to a lower level of vascular tone. Another characteristic of  $\text{K}_{\text{ATP}}$  channel is that it is inhibited by high intracellular ATP and antidiabetic sulfonyl urea compounds, such as glibenclamide and tolbutamide, and it is activated by low levels of cytosolic ATP.<sup>38</sup> If the concentration of ATP is increased inside the membrane, the  $P_o$  of  $\text{K}_{\text{ATP}}$  channel is reduced. Several hyperpolarizing vasodilators, such as VIP (vasoactive intestinal polypeptide), calcitonin gene-related peptide (CGRP), and acetylcholine, induce release of EDRF and a hyperpolarizing factor from the endothelium that are blocked by glibenclamide, indicating that these vasodilators may also act by opening  $\text{K}_{\text{ATP}}$  channel.<sup>39</sup> Endothelium-derived hyperpolarizing factor (EDHF) also has properties of  $\text{K}^+$  channel openers, although the type of  $\text{K}^+$  channel involved is not known.

An inward rectifier  $\text{K}^+$  channel is activated by hyperpolarization of the vascular smooth muscle cells, allowing the inward movement of  $\text{K}^+$ .<sup>7</sup> At membrane potentials positive to equilibrium potentials for potassium ( $E_K$  at approximately  $-90$  mV), these channels do allow an outward  $\text{K}^+$  current and, therefore, may contribute to the resting membrane potential. These channels will

be closed when the vessel is tonically depolarized during increased sympathetic nerve activity.

The time-independent background  $K^+$  current is sensitive to the external calcium concentration, and may be responsible in setting the level of the resting membrane potential.

### Gap Junctions

With increasing metabolic demand of the organ (*e.g.*, exercising muscle) a profound ascending vasodilation occurs within seconds.<sup>40</sup> This coordinated increase in blood flow is probably caused by a flow-dependent endothelial cell-mediated relaxation and smooth muscle cell-to-cell conduction. Unlike skeletal muscle, but similar to cardiac muscle, vascular muscle is coupled by gap junctions,<sup>41,42</sup> which provide a cell-to-cell low-resistance conduction pathway for the functional integration. These junctions are membrane structures that contain aqueous (nonselective) channels, linking the cytoplasm of adjacent cells. Each functional channel is formed by two hemichannels and a 12-identical protein subunit called connexins. They are responsible for equilibration of ionic and small molecular pools between the cells, electrotonic coupling, and coordinated vessel responses to different stimuli.  $Ca^{2+}$  and, perhaps,  $IP_3$  can diffuse between smooth muscle cells through gap junction channels.<sup>43</sup> A number of agents, including halothane,<sup>44</sup> alcohols, and cGMP, have been shown to decrease junctional conductance in myocardial cells, but an increase is seen in the presence of cAMP. Vascular smooth muscle gap junction conduction is also regulated by second messengers, and it was shown that cAMP is responsible for moderate decreases, and cGMP for no change, in junctional current.<sup>41</sup>

### Anesthetics

Although anesthetics are potent vasodilators, the mechanism of their action is not well understood. Inhalational anesthetics cause vasodilation in specific vascular beds, either by a direct depressant action on the vessel, or by an indirect attenuation of vasoconstrictor activity. In the *in vivo* setting, the mechanism for the altered blood flow to a specific organ during anesthesia is likely to involve interaction among endothelium, vascular smooth muscle, arterial pressure, metabolic requirement of the organ, and the autonomic nervous system. For instance, in the intact coronary

circulation, the direct effects of volatile anesthetics on arterial muscle are superimposed on their dominant depressant action on the myocardium, *i.e.*, reduced cardiac work and oxygen demand. It appears that isoflurane is a more potent coronary vasodilator than halothane in the isolated perfused heart,<sup>45</sup> and a less potent dilator of isolated coronary arterial segments.<sup>46</sup> In studies on isolated coronary artery rings<sup>44</sup> and isolated tetrodotoxin-arrested rat heart, halothane caused direct dilation of coronary vessels without affecting oxygen consumption or extraction.<sup>47</sup> Recent results have also shown that isoflurane produces potent dose-dependent relaxation of canine middle cerebral arteries *in vitro*, and that this relaxation is endothelium independent.<sup>48</sup>

Halothane and isoflurane were found to increase intracellular cAMP in rat aortic smooth muscle.<sup>49</sup> More recent studies have shown that halothane-induced vasodilation of cerebral vessels is partly mediated by an increase in tissue cGMP levels.<sup>50,51</sup> An increase in the cellular cGMP levels induces vascular smooth muscle relaxation by activating cGMP-dependent protein kinase. As indicated previously, in addition to  $Ca^{2+}$  and  $K^+$  channels, cA-PK and cG-PK also phosphorylate the sarcolemmal  $Ca^{2+}$ -ATPase and  $Na^+/Ca^{2+}$  exchanger, and stimulate the  $Ca^{2+}$  pump, and, therefore, can enhance activities of all three  $Ca^{2+}$  removal systems in vascular smooth muscle, producing vasodilation. It was recently shown that the elevations in cGMP in arterial smooth muscle can also uncouple the stress from myosin phosphorylation.<sup>52</sup> Most tissues have two guanylyl cyclase isoenzymes; a membrane-bound particulate and cytosolic (soluble) enzyme. The soluble enzyme is activated by nitric oxide radicals, and the membrane-bound enzyme is activated by atrial natriuretic factor. An increase in cGMP level induced by halothane results from activation of the particulate, but not soluble, enzyme in canine middle cerebral vessels.<sup>50</sup> Therefore, along with direct modulation of ion channels, some of the effects of halothane on ion channels may be mediated *via* an increase in tissue cGMP or cAMP levels.

Halothane and isoflurane were shown to depress agonist-induced inositol phosphate formation and increases in intracellular  $Ca^{2+}$  in isolated coronary vessels.<sup>53</sup> These anesthetics did not have significant effects on contractions evoked by direct activation of protein kinase C, indicating that they acted at the proximal part of the signal transduction pathway (*i.e.*, receptor or G protein).

In isolated aortic smooth muscle, halothane was shown to slightly decrease maximum  $Ca^{2+}$ -activated

## ION CHANNELS IN VASCULAR SMOOTH MUSCLE

tension development of the contractile proteins, decrease  $\text{Ca}^{2+}$  accumulation in the SR, and increase  $\text{Ca}^{2+}$  release from the SR.<sup>54</sup> These decreases in cellular  $\text{Ca}^{2+}$  are probably responsible for the anesthetic-induced attenuation of norepinephrine-induced oscillation in vascular tension that is associated with intracellular calcium fluxes from the SR.<sup>55</sup>

It was reported that halothane attenuates  $\alpha_2$ , but not  $\alpha_1$ , adrenoceptor responsiveness in canine saphenous vein.<sup>56</sup> The results indicated that halothane interferes with  $\alpha_2$  excitation-contraction coupling that is dependent on the influx of extracellular  $\text{Ca}^{2+}$ . In addition,  $\alpha_1$ -mediated vasoconstriction caused by the release of intracellular  $\text{Ca}^{2+}$  was far less sensitive to halothane. Recently, the direct effects of halothane, enflurane, and isoflurane were compared on the tension generated in the mesenteric venous smooth muscle. The results indicate that all three agents attenuate contractile responses to exogenous and endogenous NE, with isoflurane being more potent than halothane or isoflurane.<sup>57</sup>

The  $\alpha_2$ -adrenergic agonist, dexmedetomidine, can activate not only  $\alpha_2$  receptors in the central nervous system, but also those in the peripheral vasculature. Current results indicate<sup>58</sup> that dexmedetomidine has a direct vasoconstrictor effect on coronary and cerebral vasculature *in vitro*, and that this effect may be opposed by simultaneous release of endothelium-derived relaxing factor. Nevertheless, the direct stimulation of  $\alpha_2$  adrenoceptors by dexmedetomidine in these vessels resulted in only minimal vasoconstriction.

Recently, the effects of halothane and isoflurane on macroscopic  $\text{Ca}^{2+}$  and  $\text{K}^+$  channel currents were investigated in voltage-clamped vascular muscle cells of the canine coronary artery.<sup>36</sup> At equianesthetic concentrations, halothane was found to be more potent than isoflurane in suppressing both ionic currents in the coronary arterial cells. Moreover, both anesthetics preferentially reduced  $\text{Ca}^{2+}$  current. Thus, in the coronary artery, which relies on  $\text{Ca}^{2+}$  entry for vascular muscle activation, the reduced  $\text{Ca}^{2+}$  influx may represent one of the mechanisms by which volatile anesthetics induce dilation.

The effects of isoflurane on macroscopic long-lasting type  $\text{Ca}^{2+}$  and  $\text{K}^+$  channel currents were also investigated in voltage-clamped single canine middle cerebral

artery cells.<sup>37</sup> The results indicate that isoflurane reduced the amplitude of  $\text{K}^+$  and  $\text{Ca}^{2+}$  channel current, and that isoflurane was a more potent blocker of the  $\text{Ca}^{2+}$  channel current at more negative membrane potentials. A reduction of  $\text{Ca}^{2+}$  influx would dilate cerebral arteries, which rely predominantly on the influx of external  $\text{Ca}^{2+}$  for the maintenance of contraction.<sup>59</sup> However, the block of  $\text{K}^+$  channel current by isoflurane would favor membrane depolarization, because  $\text{K}^+$  conductance is crucial for repolarization of cell membrane potential and cerebral arterial relaxation. Although this membrane depolarization may initially open voltage-dependent  $\text{Ca}^{2+}$  channels, the effective block of  $\text{Ca}^{2+}$  influx by isoflurane would probably minimize the contribution of these channels to the cytoplasmic  $\text{Ca}^{2+}$  concentration. Therefore, the simultaneous depression of  $\text{Ca}^{2+}$  and  $\text{K}^+$  currents by isoflurane may cause electromechanical uncoupling of cerebral vascular smooth muscle. For example, halothane caused membrane depolarization despite simultaneous vascular relaxation, indicating uncoupling between the membrane potential and vascular contractions.<sup>60</sup> These results may be caused by the fact that halothane and isoflurane reduced the amplitude of  $\text{K}^+$  and  $\text{Ca}^{2+}$  currents in the vascular smooth muscle membrane.<sup>36,37</sup> However, the  $\text{Ca}^{2+}$  current was considerably more sensitive to blockade by volatile anesthetics. In general, contractile mechanisms in cerebral and coronary blood vessels appear to be more dependent on extracellular  $\text{Ca}^{2+}$  influx than on intracellular stores of  $\text{Ca}^{2+}$ , and, therefore, modulation of  $\text{Ca}^{2+}$  influx by volatile anesthetics represents a potential dilator mechanism. In addition, the results of recent studies indicate that volatile anesthetics are more potent direct dilators of cerebral than coronary vascular smooth muscle.<sup>35</sup>

Preliminary studies from our laboratory indicate that halothane at clinically relevant concentrations can produce hyperpolarization of the resting membrane potential in small mesenteric arteries and veins *in vivo*. The inhibition of inward  $\text{Ca}^{2+}$  current appears to contribute to this hyperpolarization of the resting membrane potential and, therefore, to a significant direct vasodilatory action of the potent volatile anesthetics.

The effects of halothane and isoflurane were recently examined on  $\text{Ca}^{2+}$ -activated single  $\text{K}^+$  channels in single vascular smooth muscle cells isolated from dog cerebral arteries.<sup>†</sup> Both halothane and isoflurane reversibly decreased the  $P_o$ , mean open time, and frequency of opening of a 99-pS  $\text{K}^+$  channel. The single-channel amplitude or the slope of the current-voltage relationship

† Eskinder H, Gebremedhin D, Lee JG, Rusch NJ, Kampine JP, Bosnjak ZJ: Halothane and isoflurane decrease the open state probability of  $\text{K}^+$  channels in dog cerebral arterial muscle cells (unpublished data).



was not affected by these anesthetics. From these results, it is evident that a depression of  $\text{Ca}^{2+}$ -activated  $\text{K}^+$  channel does not prevent the anesthetic-induced vasodilation of canine cerebral arteries.

In summary, it appears that anesthetics affect a number of sites that are responsible for direct excitation of vascular smooth muscle, and that the individual responses will vary depending on local vascular activity, concentration, and type of anesthetic; mode and specificity of agonist activation; role of endothelium; and other regulatory factors.

## References

1. Miller VM: Interactions between neural and endothelial mechanisms in control of vascular tone. *News in Physiological Sciences* 6:60-63, 1991
2. Bolton TB: Mechanisms of action of transmitters and other substances on smooth muscle. *Physiol Rev* 59:606-718, 1979
3. Somlyo AP, Somlyo AV: Vascular smooth muscle. *Pharmacol Rev* 22:249-353, 1970
4. Blatter LA, Wier WG: Agonist-induced  $[\text{Ca}^{2+}]_i$  waves and  $\text{Ca}^{2+}$ -induced  $\text{Ca}^{2+}$  release in mammalian vascular smooth muscle cells. *Am J Physiol* 263:H576-H586, 1992
5. Berridge MJ: Inositol triphosphate and diacylglycerol as second messengers. *Biochem J* 220:345-360, 1984
6. Byrne NG, Large WA: Membrane ionic mechanisms activated by noradrenaline in cells isolated from the rabbit portal vein. *J Physiol (Lond)* 404:557-573, 1988
7. Hirst GD, Edwards FR: Sympathetic neuroeffector transmission in arteries and arterioles. *Physiol Rev* 69:546-604, 1989
8. Nelson MT, Standen NB, Brayden JE, Worley JF: Noradrenaline contracts arteries by activating voltage-dependent calcium channels. *Nature* 336:382-385, 1988
9. Wakatsuki T, Nakaya Y, Inoue I: Vasopressin modulates  $\text{K}^+$ -channel activities of cultured smooth muscle cells from porcine coronary artery. *Am J Physiol* 263:H491-H496, 1992
10. Cauvin C, Loutzenhiser R, Van Breemen C: Mechanisms of calcium antagonist-induced vasodilation. *Annu Rev Pharmacol Toxicol* 23:373-396, 1983
11. Ohya Y, Sperelakis N: Involvement of a GTP-binding protein in stimulating action of angiotensin II on calcium channels in vascular smooth muscle cells. *Circ Res* 68:763-771, 1991
12. Ohya Y, Sperelakis N: Agonist modulation of voltage-dependent calcium channels in vascular smooth muscles, *Ion Channels of Vascular Smooth Muscle Cells and Endothelial Cells*. Edited by Sperelakis N, Kuriyama H. New York, Elsevier, 1991, pp 39-46
13. Bkaily G, Peyrow M, Sculptoreanu A, Jacques D, Chahine M, Regoli D, Sperelakis N: Angiotensin II increases  $I_{\text{L}}$  and blocks  $I_{\text{K}}$  in single aortic cell of rabbit. *Pflügers Arch* 412:448-450, 1988
14. Yanagisawa M, Kurihara H, Kimura S, Tomobe Y, Kobayashi M, Mitsui Y, Yazaki Y, Goto K, Masaki T: A novel potent vasoconstrictor peptide produced by vascular endothelial cells. *Nature* 332:411-415, 1988
15. Klockner U, Isenberg G: Endothelin depolarizes myocytes from porcine coronary and human mesenteric arteries through a  $\text{Ca}^{2+}$ -activated chloride current. *Pflügers Arch* 418:168-175, 1991
16. Chen C, Wagoner PK: Endothelin induces a nonselective cation current in vascular smooth muscle cells. *Circ Res* 69:447-454, 1991
17. Nishimura J, Moreland S, Ahn HY, Kawase T, Moreland RS, van Breemen C: Endothelin increases myofilament  $\text{Ca}^{2+}$  sensitivity in  $\alpha$ -toxin-permeabilized rabbit mesenteric artery. *Circ Res* 71:951-959, 1992
18. Sakata K, Ozaki H, Kwon SC, Karaki H: Effects of endothelin on the mechanical activity and cytosolic calcium level of various types of smooth muscle. *Br J Pharmacol* 98:483-492, 1989
19. Le Monnier de Gouvillae AC, Lippman HL, Caverio I, Summer WR, Hyman AL: Endothelin: A new family of endothelium-derived peptides with widespread biological properties. *Life Sci* 45:1499-1513, 1989
20. Meninger GA, Davis MJ: Cellular mechanisms involved in the vascular myogenic response. *Am J Physiol* 263:H647-H659, 1992
21. Nelson MT, Patlak JB, Worley JF, Standen NB: Calcium channels, potassium channels, and voltage dependence of arterial smooth muscle tone. *Am J Physiol* 259:C3-C18, 1990
22. van Breemen C, Cauvin C, Johns A, Leijten P, Yamamoto H:  $\text{Ca}^{2+}$  regulation of vascular smooth muscle. *Fed Proc* 45:2746-2751, 1986
23. Vrolix M, Raeymaekers L, Wuytack F, Hofmann F, Casteels R: Cyclic GMP-dependent protein kinase stimulates the plasmalemmal  $\text{Ca}^{2+}$  pump of smooth muscle via phosphorylation of phosphatidylinositol. *Biochem J* 255:855-863, 1988
24. Lauger P: Voltage dependence of sodium-calcium exchange: Predictions from kinetic models. *J Membr Biol* 99:1-11, 1987
25. Sperelakis N, Ohya Y: Regulation of calcium slow channels in vascular smooth muscle cells, *Ion Channels of Vascular Smooth Muscle Cells and Endothelial Cells*. Edited by Sperelakis N, Kuriyama H. New York, Elsevier, 1991, pp 27-38
26. Bkaily G: Receptor and second messenger modulation of  $\text{Ca}^{2+}$  and  $\text{K}^+$  channels activity in vascular smooth muscle cells, *Ion Channels of Vascular Smooth Muscle Cells and Endothelial Cells*. Edited by Sperelakis N, Kuriyama. New York, Elsevier, 1991, pp 185-198
27. Rashatwar SS, Cornwell TL, Lincoln TM: Effects of 8-bromo-cGMP on  $\text{Ca}^{2+}$  levels in vascular smooth muscle cells: Possible regulation of  $\text{Ca}^{2+}$ -ATPase by cGMP-dependent protein kinase. *Proc Natl Acad Sci U S A* 84:5685-5689, 1987
28. Furukawa K-I, Ohshima N, Tawada-Iwata Y, Shigekawa M: Cyclic GMP stimulates  $\text{Na}^+/\text{Ca}^{2+}$  exchange in vascular smooth muscle cells in primary culture. *J Biol Chem* 266:12337-12341, 1991
29. Hume JR, Leblanc N: Macroscopic  $\text{K}^+$  currents in single smooth muscle cells of the rabbit portal vein. *J Physiol (Lond)* 413:49-73, 1989
30. Gelband CH, Hume JR: Ionic currents in single smooth muscle cells of the canine renal artery. *Circ Res* 71:745-758, 1992
31. Langton PD, Nelson MT, Huang Y, Standen NB: Block of calcium-activated potassium channels in mammalian arterial myocytes by tetraethylammonium ions. *Am J Physiol* 260:H927-H934, 1991
32. Renaud JF, Bkaily G, Benabderazik M, Jacques D, Sperelakis N: Bay K 8644 induce enhancement of  $\text{K}^+$  current in both single heart cell and smooth muscle cell. *Mol Cell Biochem* 80:73-78, 1988
33. Brayden JE, Nelson MT: Regulation of arterial tone by activation of calcium-dependent potassium channels. *Science* 256:532-535, 1992
34. Toro L, Stefani E: Calcium activated  $\text{K}^+$  channels: Metabolic regulation. *J Bioenerg Biomembr* 23:561-576, 1991

## ION CHANNELS IN VASCULAR SMOOTH MUSCLE

35. Marijic J, Buljubasic N, Coughlan MG, Kampine JP, Bosnjak ZJ: Effect of K<sup>+</sup> channel blockade with tetraethylammonium on anesthetic-induced relaxation in canine cerebral and coronary arteries. *ANESTHESIOLOGY* 77:948-955, 1992
36. Buljubasic N, Rusch NJ, Marijic J, Kampine JP, Bosnjak ZJ: Effects of halothane and isoflurane on calcium and potassium channel currents in canine coronary arterial cells. *ANESTHESIOLOGY* 76:990-998, 1992
37. Buljubasic N, Flynn NM, Marijic J, Rusch NJ, Kampine JP, Bosnjak ZJ: Effects of isoflurane on K<sup>+</sup> and Ca<sup>2+</sup> conductance in isolated smooth muscle cells of canine cerebral arteries. *Anesth Analg* 75:590-596, 1992
38. Standen NB, Quayle JM, Davies NW, Brayden JE, Huang Y, Nelson MT: Hyperpolarizing vasodilators activate ATP-sensitive K<sup>+</sup> channels in arterial smooth muscle. *Science* 245:177-180, 1989
39. Nelson MT, Huang Y, Brayden JE, Hescheler J, Standen NB: Arterial dilations in response to calcitonin gene-related peptide involve activation of K<sup>+</sup> channels. *Nature* 344:770-773, 1990
40. Segal SS: Communication among endothelial and smooth muscle cells coordinates blood flow control during exercise. *News in Physiological Sciences* 7:152-156, 1992
41. Moore LK, Beyer EC, Burt JM: Characterization of gap junction channels in A7r5 vascular smooth muscle cells. *Am J Physiol* 260:C975-C981, 1991
42. Larson DM, Haudenschild CC, Beyer EC: Gap junction messenger RNA expression by vascular wall cells. *Circ Res* 66:1074-1080, 1990
43. Christ GJ, Moreno AP, Melman A, Spray DC: Gap junction-mediated intercellular diffusion of Ca<sup>2+</sup> in cultured human corporal smooth muscle cells. *Am J Physiol* 263:C373-C383, 1992
44. Burt JM, Spray DC: Volatile anesthetics block intercellular communication between neonatal rat myocardial cells. *Circ Res* 65:829-837, 1989
45. Stowe DF, Marijic J, Bosnjak ZJ, Kampine JP: Direct comparative effects of halothane, enflurane, and isoflurane on oxygen supply and demand in isolated hearts. *ANESTHESIOLOGY* 74:1087-1095, 1991
46. Bollen BA, Tinker JH, Hermsmeyer K: Halothane relaxes previously constricted isolated porcine coronary artery segments more than isoflurane. *ANESTHESIOLOGY* 66:748-752, 1987
47. Larach DR, Schuler HG, Skeehan TM, Peterson CJ: Direct effects of myocardial depressant drugs on coronary vascular tone: Anesthetic vasodilation by halothane and isoflurane. *J Pharmacol Exp Ther* 254:58-64, 1990
48. Flynn NM, Buljubasic N, Bosnjak ZJ, Kampine JP: Isoflurane produces endothelium-independent relaxation in canine middle cerebral arteries. *ANESTHESIOLOGY* 76:461-467, 1992
49. Sprague DH, Yang JC, Ngai SH: Effects of isoflurane and halothane on contractility and the cyclic 3',5'-adenosine monophosphate system in the rat aorta. *ANESTHESIOLOGY* 40:162-167, 1974
50. Eskinder H, Hillard CJ, Flynn NM, Bosnjak ZJ, Kampine JP: Role of guanylate cyclase-cGMP systems in halothane-induced vasodilation in canine cerebral arteries. *ANESTHESIOLOGY* 77:482-487, 1992
51. Nakamura K, Hatano Y, Toda H, Nishiwada M, Baek WY, Mori K: Halothane-induced relaxation of vascular smooth muscle: A possible contribution of increased cyclic GMP formation. *Jpn J Pharmacol* 55:165-168, 1991
52. McDaniel NL, Chen XL, Singer HA, Murphy RA, Rembold CM: Nitrovasodilators relax arterial smooth muscle by decreasing [Ca<sup>2+</sup>]<sub>i</sub> and uncoupling stress from myosin phosphorylation. *Am J Physiol* 263:C461-C467, 1992
53. Sill JC, Ozhan M, Nelson R, Uhl C: Isoflurane-, halothane-, and agonist-evoked responses in pig coronary arteries and vascular smooth muscle cells, Mechanisms of Anesthetic Action in Skeletal, Cardiac, and Smooth Muscle. Edited by Blanck TJJ, Wheeler DM. New York, Plenum, 1991, pp 257-269
54. Su JY, Zhang CC: Intracellular mechanisms of halothane's effect on isolated aortic strips of the rabbit. *ANESTHESIOLOGY* 71:409-417, 1989
55. Marijic J, Madden JA, Kampine JP, Bosnjak ZJ: The effects of halothane on norepinephrine responsiveness in rabbit small mesenteric veins. *ANESTHESIOLOGY* 73:479-484, 1990
56. Larach DR, Schuler HG, Derr JA, Larach MG, Hensley FA, Zelis R: Halothane selectively attenuates  $\alpha_2$ -adrenoceptor mediated vasoconstriction, *in vivo* and *in vitro*. *ANESTHESIOLOGY* 66:781-791, 1987
57. Stadnicka A, Flynn NM, Bosnjak ZJ, Kampine JP: Enflurane, halothane and isoflurane attenuate contractile responses to exogenous and endogenous norepinephrine in isolated small mesenteric veins of the rabbit. *ANESTHESIOLOGY* 78:326-334, 1993
58. Coughlan MG, Lee JG, Bosnjak ZJ, Schmeling WT, Kampine JP, Warltier DC: Direct coronary and cerebral vascular responses to dexmedetomidine: Significance of endogenous nitric oxide synthesis. *ANESTHESIOLOGY* 77:998-1006, 1992
59. Bevan JA, Bevan RD: Arterial wall changes in chronic cerebrovasospasm: In vitro and in vivo pharmacological evidence. *Annu Rev Pharmacol Toxicol* 28:311-329, 1988
60. Harder DR, Gradall K, Madden JA, Kampine JP: Cellular actions of halothane on cat cerebral arterial muscle. *Stroke* 16:680-683, 1985
